# Supplementary material for: Matrix isolation FTIR study of hydrogen-bonded complexes of methanol with heterocyclic organic compounds
Source: Royal Society of Chemistry journal article supplement (doi:10.1039/c6ra26076d), 2017-01-01
Supplement: c6ra26076d1.pdf [file c6ra26076d1.pdf]

Electronic supplementary information (ESI)

**Matrix Isolation FTIR Study of Hydrogen-bonded Complexes of  
Methanol with Heterocyclic Organic Compounds**

Xiaotong Jiang, Shijie Liu, Narcisse T. Tsona, Shanshan Tang, Lei Ding, Hailiang  
Zhao, Lin Du\*

Environment Research Institute, Shandong University, Shanda South Road 27,  
250100 Shandong, China

**Corresponding author**

\*E-mail: [lindu@sdu.edu.cn](mailto:lindu@sdu.edu.cn)

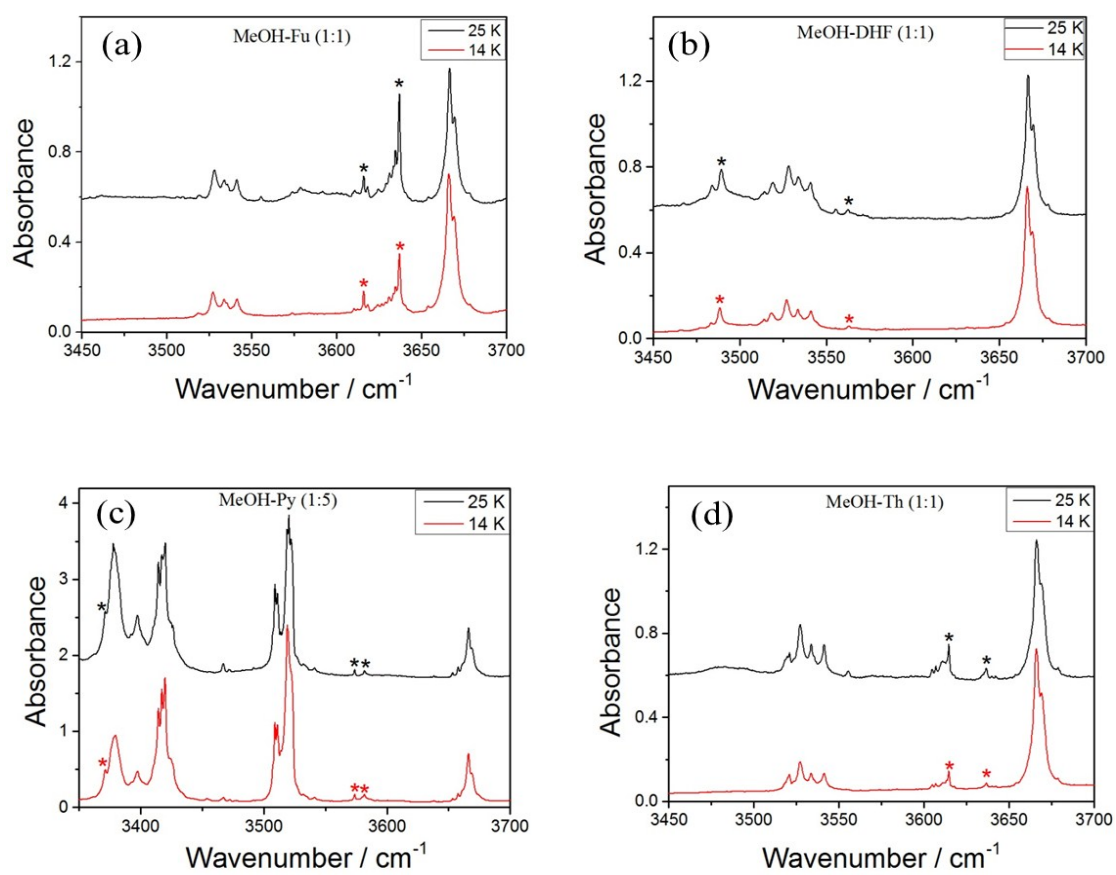

Fig. S1 Matrix isolation FTIR spectra of the MeOH complexes at different temperature. (a) MeOH/Fu/Ar = 1/1/700; (b) MeOH/DHF/Ar = 1/1/700; (c) MeOH/Py/Ar = 1/5/700; (d) MeOH/Th/Ar = 1/1/700. Bands marked with asterisk are new features from the complexes. The spectra were offset for clarity.

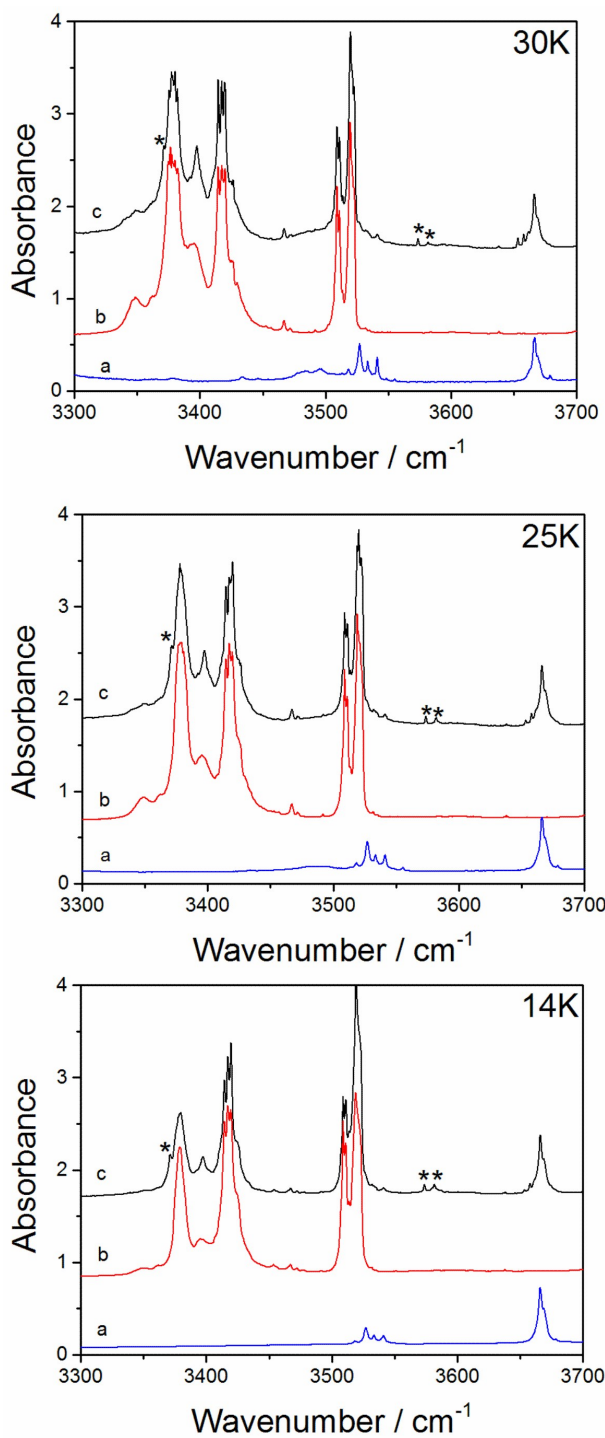

Fig. S2 Matrix isolation FTIR spectra of MeOH, pyrrole, and the co-deposition of them at 14 K, 25 K, 30 K. (a) MeOH/Ar = 1/140; (b) Py/Ar = 1/700; (c) MeOH/Py/Ar = 1/5/700. Bands marked with asterisk are new features from MeOH–Py complex. The spectra were offset for clarity.

Table S1 Selected optimized geometric parameters in the MeOH–Fu, MeOH–DHF, MeOH–Py and MeOH–Th complexes (angles in degrees and bond lengths in Å).

| Conformer                | Bond type       | Method <sup>a</sup> | R(OH) <sup>b</sup> | $\Delta r(\text{OH})$ <sup>c</sup> | R(HB) <sup>d</sup> | $\theta(\text{HB})$ <sup>e</sup> |
|--------------------------|-----------------|---------------------|--------------------|------------------------------------|--------------------|----------------------------------|
| MeOH–Fu (a)              | O–H $\cdots\pi$ | M06-2X              | 0.9610             | 0.0025                             |                    |                                  |
|                          |                 | $\omega$ B97XD      | 0.9590             | 0.0028                             |                    |                                  |
|                          |                 | B3LYP-D3            | 0.9630             | 0.0022                             |                    |                                  |
| MeOH–Fu (b)              | O–H $\cdots$ O  | M06-2X              | 0.9609             | 0.0024                             | 2.1595             | 134.1                            |
|                          |                 | $\omega$ B97XD      | 0.9590             | 0.0029                             | 2.1218             | 144.5                            |
|                          |                 | B3LYP-D3            | 0.9627             | 0.0019                             | 2.1590             | 140.3                            |
| MeOH–DHF (b)             | O–H $\cdots$ O  | M06-2X              | 0.9673             | 0.0088                             | 1.8567             | 164.2                            |
|                          |                 | $\omega$ B97XD      | 0.9668             | 0.0106                             | 1.8445             | 172.3                            |
|                          |                 | B3LYP-D3            | 0.9710             | 0.0102                             | 1.8464             | 170.5                            |
| MeOH–Py (a) <sup>g</sup> | O–H $\cdots\pi$ | M06-2X              | 0.9662             | 0.0061                             |                    |                                  |
|                          |                 | $\omega$ B97XD      | 0.9662             | 0.0087                             |                    |                                  |
|                          |                 | B3LYP-D3            | 0.9704             | 0.0085                             |                    |                                  |
| Py–MeOH (b) <sup>f</sup> | N–H $\cdots$ O  | M06-2X              | 1.0098             | 0.0512                             | 1.9851             | 148.6                            |
|                          |                 | $\omega$ B97XD      | 1.0101             | 0.0540                             | 1.9291             | 166.1                            |
|                          |                 | B3LYP-D3            | 1.0106             | 0.0498                             | 1.9383             | 163.8                            |
| MeOH–Th (a) <sup>g</sup> | O–H $\cdots\pi$ | M06-2X              | 0.9717             | 0.0102                             |                    |                                  |
|                          |                 | $\omega$ B97XD      | 0.9720             | 0.0136                             |                    |                                  |
|                          |                 | B3LYP-D3            | 0.9764             | 0.0133                             |                    |                                  |

<sup>a</sup> The MeOH–Th complexes are calculated with the aug-cc-pV(T+d)Z basis set, and all other complexes with the aug-cc-pVTZ basis set, respectively. <sup>b</sup> OH bond length in the complex. <sup>c</sup> Change in the OH/NH bond length upon complexation. <sup>d</sup> Intermolecular hydrogen bond distance. <sup>e</sup> Intermolecular hydrogen bond angle. <sup>f</sup> In the Py–MeOH (b) complex, MeOH acts as hydrogen bond acceptor. R(NH) for pyrrole. R(NH<sub>b</sub> $\cdots$ O) and  $\theta(\text{NH}_b\cdots\text{O})$  for the Py–MeOH complexes. <sup>g</sup> MeOH–DHF (a) and MeOH–Th (b) conformer couldn't be located with the M06-2X,  $\omega$ B97XD and B3LYP-D3 functionals.

Table S2 Calculated binding energies ( $BE$ ), zero point vibrational energy (ZPVE), enthalpies of formation ( $\Delta H^\theta$ ), and Gibbs free energies of formation ( $\Delta G^\theta$ ) for the MeOH–Fu, MeOH–DHF, MeOH–Py and MeOH–Th complexes with M06-2X,  $\omega$ B97XD and B3LYP-D3 functionals.

| Method <sup>a</sup> | Conformer                 | Bond type       | $BE$ <sup>b</sup> | ZPVE | $\Delta H^\theta$ | $\Delta G^\theta$ |
|---------------------|---------------------------|-----------------|-------------------|------|-------------------|-------------------|
| M06-2X              | MeOH–Fu (a)               | O–H $\cdots\pi$ | -14.1             | 3.2  | -14.4             | 25.2              |
|                     | MeOH–Fu (b)               | O–H $\cdots$ O  | -11.1             | 5.7  | -10.8             | 26.4              |
|                     | MeOH–DHF (b) <sup>d</sup> | O–H $\cdots$ O  | -19.6             | 5.8  | -19.4             | 16.5              |
|                     | MeOH–Py (a)               | O–H $\cdots\pi$ | -18.3             | 4.9  | -17.8             | 18.5              |
|                     | Py–MeOH (b) <sup>c</sup>  | N–H $\cdots$ O  | -18.6             | 5.4  | -13.9             | 17.1              |
|                     | MeOH–Th (a) <sup>d</sup>  | O–H $\cdots\pi$ | -15.1             | 3.7  | -14.3             | 22.3              |
| $\omega$ B97XD      | MeOH–Fu (a)               | O–H $\cdots\pi$ | -5.6              | 3.0  | -6.4              | 38.3              |
|                     | MeOH–Fu (b)               | O–H $\cdots$ O  | -10.9             | 4.3  | -9.8              | 23.3              |
|                     | MeOH–DHF (b)              | O–H $\cdots$ O  | -20.5             | 6.7  | -19.7             | 15.2              |
|                     | MeOH–Py (a)               | O–H $\cdots\pi$ | -17.3             | 5.1  | -16.7             | 18.7              |
|                     | Py–MeOH (b) <sup>c</sup>  | N–H $\cdots$ O  | -19.3             | 5.2  | -17.9             | 15.2              |
| B3LYP-D3            | MeOH–Fu (a)               | O–H $\cdots\pi$ | -13.5             | 3.3  | -11.8             | 19.6              |
|                     | MeOH–Fu (b)               | O–H $\cdots$ O  | -12.9             | 4.1  | -11.5             | 19.5              |
|                     | MeOH–DHF (b)              | O–H $\cdots$ O  | -22.8             | 5.7  | -22.1             | 10.8              |
|                     | MeOH–Py (a)               | O–H $\cdots\pi$ | -18.1             | 3.4  | -16.4             | 13.3              |
|                     | Py–MeOH (b) <sup>c</sup>  | N–H $\cdots$ O  | -21.9             | 3.8  | -18.3             | 6.8               |
|                     | MeOH–Th (a)               | O–H $\cdots\pi$ | -15.0             | 3.2  | -13.1             | 17.6              |

<sup>a</sup> The MeOH–Th complexes are calculated with the aug-cc-pV(T+d)Z basis set, and all other complexes with the aug-cc-pVTZ basis set, respectively. <sup>b</sup>  $BE$  corrected with ZPVE. All energies given in kJ mol<sup>-1</sup>. <sup>c</sup> In the Py–MeOH (b) complex, MeOH acts as hydrogen bond acceptor. <sup>d</sup> MeOH–DHF (a) and MeOH–Th (b) conformer couldn't be located with the M06-2X,  $\omega$ B97XD and B3LYP-D3 functionals.
